# Supplementary figures and images for: Esophageal oxyhemoglobin saturation as a resuscitative metric in hemorrhagic shock
Source: HighWire-hosted journal article supplement (doi:10.1136/tsaco-2024-001480), 2024-08-01

**A**

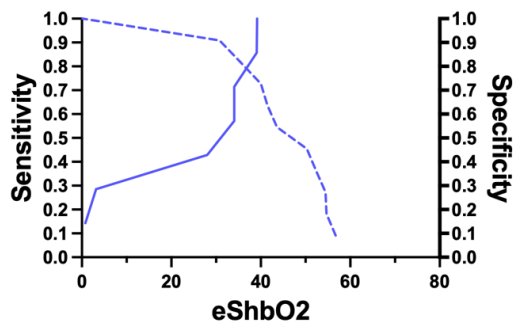

**B**

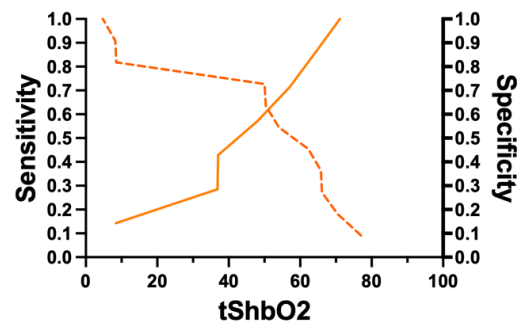

**C**

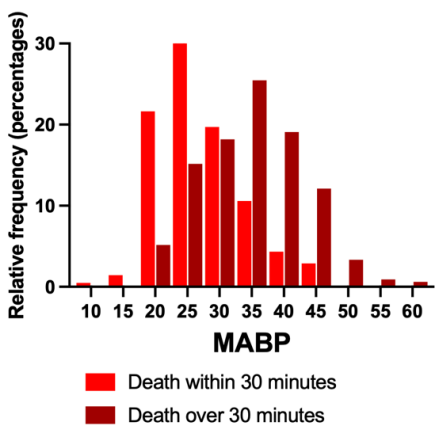

**D**

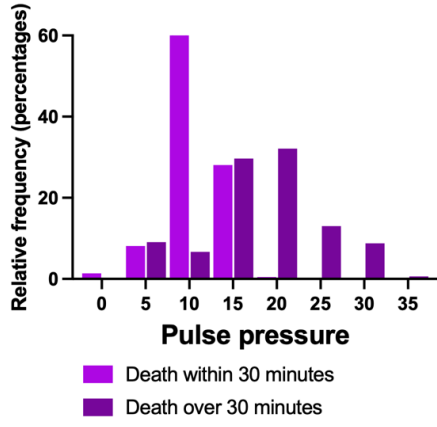

**E**

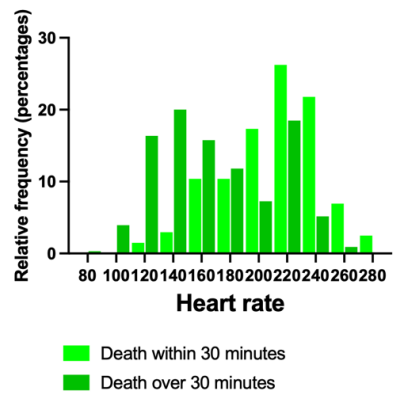

Supplement: tsaco-2024-001480supp002_data_supplement.pdf [file tsaco-2024-001480supp002_data_supplement.pdf]
